# Supplementary material for: Translation and validation of the PACIC+ questionnaire: the Thai version
Source: Springer Nature journal article supplement (doi:10.1186/s12875-018-0801-y), 2018-07-19
Supplement: MOESM2 [file 15964186]

## แบบสอบถามการดูแลของโรคเรื้อรัง

การดูแลสุขภาพอาจจะเป็นเรื่องที่ยากถ้าหากคุณเป็นโรคเรื้อรัง  
 พวกเราต้องการจะทราบว่า คุณได้รับความช่วยเหลือเช่นใดบ้างจากทีมดูแลสุขภาพของคุณ  
 ซึ่งจะรวมไปถึงแพทย์ประจำบ้าน พยาบาล และผู้ช่วยต่างๆที่มีส่วนร่วมในการรักษาโรคเบาหวานของคุณ  
 ข้อมูลของคุณจะถูกเก็บเป็นความลับและไม่เปิดเผยแก่ผู้ใดนอกเหนือจากคณะผู้วิจัย

กรุณาทบทวนถึงการดูแลโรคเบาหวานของคุณใน 6 เดือนที่ผ่านมา (หากครั้งสุดท้ายที่คุณพบแพทย์นานกว่า 6 เดือนมาแล้วให้พยายามนึกถึงครั้งล่าสุดที่คุณไปพบแพทย์มา)

ใน 6 เดือนที่ผ่านมา ระหว่างที่ฉันได้รับการดูแลโรคเบาหวาน...

|                                                                                                   | แทบจะ<br>ไม่เคย          | โดยทั่วไป<br>ไม่         | บางครั้ง                 | ส่วนใหญ่                 | แทบจะ<br>ทุกครั้ง        |
|---------------------------------------------------------------------------------------------------|--------------------------|--------------------------|--------------------------|--------------------------|--------------------------|
| 1. ฉันได้รับการสอบถามความคิดเห็นเกี่ยวกับแผนการรักษา                                              | <input type="checkbox"/> | <input type="checkbox"/> | <input type="checkbox"/> | <input type="checkbox"/> | <input type="checkbox"/> |
| 2. ฉันได้รับการเสนอแนะทางเลือกการรักษา                                                            | <input type="checkbox"/> | <input type="checkbox"/> | <input type="checkbox"/> | <input type="checkbox"/> | <input type="checkbox"/> |
| 3. ฉันได้รับการสอบถามเกี่ยวกับปัญหาการใช้ยาและผลของยา                                             | <input type="checkbox"/> | <input type="checkbox"/> | <input type="checkbox"/> | <input type="checkbox"/> | <input type="checkbox"/> |
| 4. ฉันได้รับรายละเอียดเกี่ยวกับข้อปฏิบัติที่ฉันควรจะทำเพื่อฟื้นฟูสุขภาพของฉัน                     | <input type="checkbox"/> | <input type="checkbox"/> | <input type="checkbox"/> | <input type="checkbox"/> | <input type="checkbox"/> |
| 5. ฉันพอใจการจัดการดูแลสุขภาพของฉัน                                                               | <input type="checkbox"/> | <input type="checkbox"/> | <input type="checkbox"/> | <input type="checkbox"/> | <input type="checkbox"/> |
| 6. ฉันได้รับทราบว่า สิ่งที่ฉันปฏิบัติมีผลอย่างไรกับโรคของฉัน                                      | <input type="checkbox"/> | <input type="checkbox"/> | <input type="checkbox"/> | <input type="checkbox"/> | <input type="checkbox"/> |
| 7. ฉันได้รับการสอบถามถึงเป้าหมายในการรักษาโรคของฉัน                                               | <input type="checkbox"/> | <input type="checkbox"/> | <input type="checkbox"/> | <input type="checkbox"/> | <input type="checkbox"/> |
| 8. ฉันได้รับความช่วยเหลือในการตั้งเป้าหมายเพื่อที่จะปรับปรุงอุปนิสัยการกินและการออกกำลังกายของฉัน | <input type="checkbox"/> | <input type="checkbox"/> | <input type="checkbox"/> | <input type="checkbox"/> | <input type="checkbox"/> |
| 9. ฉันได้รับสำเนาของแผนการรักษาของฉัน                                                             | <input type="checkbox"/> | <input type="checkbox"/> | <input type="checkbox"/> | <input type="checkbox"/> | <input type="checkbox"/> |
| 10. ฉันได้รับการสนับสนุนให้เข้าร่วมกับกลุ่มที่จะช่วยฉันรับมือกับโรคของฉัน                         | <input type="checkbox"/> | <input type="checkbox"/> | <input type="checkbox"/> | <input type="checkbox"/> | <input type="checkbox"/> |
| 11. ฉันได้รับการสอบถามถึงการดูแลสุขภาพของฉัน                                                      | <input type="checkbox"/> | <input type="checkbox"/> | <input type="checkbox"/> | <input type="checkbox"/> | <input type="checkbox"/> |
| 12. ฉันมั่นใจว่าหมอหรือพยาบาลคำนึงถึงค่านิยมและประเพณีของฉันเมื่อเขาแนะนำแผนการดูแลให้ฉัน         | <input type="checkbox"/> | <input type="checkbox"/> | <input type="checkbox"/> | <input type="checkbox"/> | <input type="checkbox"/> |

ใน 6 เดือนที่ผ่านมา ระหว่างที่ฉันได้รับการดูแลโรคเบาหวาน...

|                                                                                                             | แทบจะ<br>ไม่เคย          | โดยทั่ว<br>ไปไม่         | บาง<br>ครั้ง             | ส่วนใหญ่                 | แทบจะ<br>ทุกครั้ง        |
|-------------------------------------------------------------------------------------------------------------|--------------------------|--------------------------|--------------------------|--------------------------|--------------------------|
| 13. ฉันได้รับความช่วยเหลือในการสร้างแผนการดูแลที่ฉันสามารถทำได้ในกิจวัตรประจำวัน                            | <input type="checkbox"/> | <input type="checkbox"/> | <input type="checkbox"/> | <input type="checkbox"/> | <input type="checkbox"/> |
| 14. ฉันได้รับความช่วยเหลือในการสร้างแผนการดูแลล่วงหน้า เพื่อที่ฉันจะได้สามารถดูแลโรคของฉันได้แม้ในยามคับขัน | <input type="checkbox"/> | <input type="checkbox"/> | <input type="checkbox"/> | <input type="checkbox"/> | <input type="checkbox"/> |
| 15. ฉันได้รับการสอบถามถึงผลกระทบจากโรคต่อชีวิตประจำวันของฉัน                                                | <input type="checkbox"/> | <input type="checkbox"/> | <input type="checkbox"/> | <input type="checkbox"/> | <input type="checkbox"/> |
| 16. ฉันได้รับการติดต่อหลังการพบแพทย์เพื่อสอบถามความเป็นไป                                                   | <input type="checkbox"/> | <input type="checkbox"/> | <input type="checkbox"/> | <input type="checkbox"/> | <input type="checkbox"/> |
| 17. ฉันได้รับการสนับสนุนให้เข้าร่วมโครงการในชุมชนที่อาจจะช่วยฉันได้                                         | <input type="checkbox"/> | <input type="checkbox"/> | <input type="checkbox"/> | <input type="checkbox"/> | <input type="checkbox"/> |
| 18. ฉันได้รับการแนะนำเกี่ยวกับ นักโภชนาการ หรือที่ปรึกษา                                                    | <input type="checkbox"/> | <input type="checkbox"/> | <input type="checkbox"/> | <input type="checkbox"/> | <input type="checkbox"/> |
| 19. ฉันได้รับคำแนะนำเรื่องการไปพบแพทย์อื่นๆเช่น จักษุแพทย์ และแพทย์ผ่าตัด ซึ่งอาจมีผลในการรักษา             | <input type="checkbox"/> | <input type="checkbox"/> | <input type="checkbox"/> | <input type="checkbox"/> | <input type="checkbox"/> |
| 20. ฉันได้รับการสอบถามถึงผลการไปพบแพทย์อื่นๆ                                                                | <input type="checkbox"/> | <input type="checkbox"/> | <input type="checkbox"/> | <input type="checkbox"/> | <input type="checkbox"/> |
| 21. ฉันได้รับการสอบถามถึงสิ่งที่ฉันต้องการจะพูดคุยเกี่ยวกับโรคของฉันในการไปพบแพทย์อื่นๆ                     | <input type="checkbox"/> | <input type="checkbox"/> | <input type="checkbox"/> | <input type="checkbox"/> | <input type="checkbox"/> |
| 22. ฉันได้รับการสอบถามว่า งาน ครอบครัว หรือสถานะทางสังคมเกี่ยวข้องกับการดูแลโรคของฉันอย่างไร                | <input type="checkbox"/> | <input type="checkbox"/> | <input type="checkbox"/> | <input type="checkbox"/> | <input type="checkbox"/> |
| 23. ฉันได้รับความช่วยเหลือในการวางแผน เพื่อให้ได้รับความช่วยเหลือจากเพื่อน ครอบครัว หรือสังคม               | <input type="checkbox"/> | <input type="checkbox"/> | <input type="checkbox"/> | <input type="checkbox"/> | <input type="checkbox"/> |
| 24. ฉันได้รับการอธิบายว่า สิ่งที่ฉันจะต้องทำ (เช่น การออกกำลังกาย) มีความสำคัญต่อสุขภาพของฉันอย่างไร        | <input type="checkbox"/> | <input type="checkbox"/> | <input type="checkbox"/> | <input type="checkbox"/> | <input type="checkbox"/> |
| 25. ฉันกับทีมได้ตั้งเป้าหมายร่วมกันในสิ่งที่ฉันควรทำเพื่อควบคุมโรคของฉัน                                    | <input type="checkbox"/> | <input type="checkbox"/> | <input type="checkbox"/> | <input type="checkbox"/> | <input type="checkbox"/> |
| 26. ฉันได้รับสมุดเพื่อใช้จดบันทึกความคืบหน้าของฉัน                                                          | <input type="checkbox"/> | <input type="checkbox"/> | <input type="checkbox"/> | <input type="checkbox"/> | <input type="checkbox"/> |
